# Supplementary material for: Proteome sampling with e-biopsy enables differentiation between cutaneous squamous cell carcinoma and basal cell carcinoma
Source: bioRxiv or medRxiv preprint supplement (doi:10.1101/2022.12.22.22283845), 2022-12-22
Supplement: Supplementary file [file media-1.pdf]

# Proteome sampling with e-biopsy enables differentiation between cutaneous squamous cell carcinoma and basal cell carcinoma

Edward Vitkin<sup>1,2</sup>, Julia Wise<sup>1</sup>, Ariel Berl<sup>3</sup>, Ofir Shir-az<sup>3</sup>, Batel Gabay<sup>1</sup>, Amrita Singh<sup>1</sup>, Vladimir Kravtsov<sup>4</sup>, Zohar Yakhini<sup>2,5</sup>, Avshalom Shalom<sup>3</sup>, Alexander Golberg<sup>2</sup>.

<sup>1</sup>Porter School of Environment and Earth Sciences, Tel Aviv University, Tel Aviv, Israel

<sup>2</sup>Arazi School of Computer Science, Reichman University, Herzliya, Israel

<sup>3</sup>Department of Plastic Surgery, Meir Medical Center, Kefar Sava, Israel.

<sup>4</sup>Department of Pathology, Meir Medical Center, Kefar Sava, Israel.

<sup>5</sup>Department of Computer Science, Technion - Israel Institute of Technology, Haifa, Israel

## Supplementary Information

<https://github.com/GolbergLab/BCCvsSCC>

**Table S1.** Electrical and thermal properties of human skin used for the numerical simulations.

**Table S2.** Reproducibility analysis of molecular harvesting with e-biopsy

**Table S3.** Sampled proteins unique to BCC

**Table S4.** Sampled proteins unique to cSCC

**Table S5.** Student TTest of SCC vs BCC

**Table S6.** Wilcoxon rank sum test of SCC vs BCC

**Table S7.** Differential expression summary of SCC vs BCC

**Table S8.** Input to GOrilla tool

**Table S9.** GOrilla Output. GO Processes significantly different between cSCC and BCC patients

**Table S10.** GOrilla Output. GO Functions significantly different between cSCC and BCC patients

**Table S11.** GOrilla Output. GO Components significantly different between cSCC and BCC patients

**Table S12.** Performances of different Machine Learning models over different amounts of selected proteins

**Table S13.** References (from IntAct DB) used to construct the protein-protein interaction map on **Figure 6**.

**Table S14.** Pathways where proteins from **Table 5** participate.

**Figure S1** Patient Demographics

**a.** Gender distribution of patients; **b.** Age distribution of patients; **c.** Country of birth distribution of patients

**Figure S2** GO Processes significantly different between cSCC and BCC patients

**Figure S3** GO Functions significantly different between cSCC and BCC patients

**Figure S4** GO Components significantly different between cSCC and BCC patients
